# Supplementary material
Source: ML conference proceedings conference paper supplement (https://proceedings.neurips.cc/paper_files/paper/2023/hash/4b4d25dc0c52d3cf43d5b203cdfdf241-Abstract.html)
Supplement: Supplementary file 1 [file 4b4d25dc0c52d3cf43d5b203cdfdf241-Supplemental-Conference.pdf]

# Supplement

These appendices supplement the paper *Gradient Free Kernel Stein Discrepancy*. The proofs for theoretical results stated in the main text are contained in Appendix A. Theoretical analysis of stochastic gradient estimators for use in the context of Stein Variational Inference is contained in Appendix B, as advertised in Section 4.2 of the main text. All additional details related to empirical assessment are contained in Appendix C.

## A Proof of Results in the Main Text

This appendix contains proofs for all novel theoretical results reported in the main text.

*Proof of Proposition 1.* First we show that the integral in the statement is well-defined. Since  $h$  and its first derivatives are bounded, we can define the constants  $C_0 := \sup\{\|h(x)\| : x \in \mathbb{R}^d\}$  and  $C_1 := \sup\{|\nabla \cdot h(x)| : x \in \mathbb{R}^d\}$ . Then

$$\begin{aligned} \int |\mathcal{S}_{p,q}h| dp &= \int \left| \frac{q}{p} [\nabla \cdot h + h \cdot \nabla \log q] \right| dp = \int |\nabla \cdot h + h \cdot \nabla \log q| dq \\ &\leq C_1 + C_0 \int \|\nabla \log q\| dq < \infty, \end{aligned}$$

so indeed the integral is well-defined. Now, let  $B_r = \{x \in \mathbb{R}^d : \|x\| \leq r\}$ ,  $S_r = \{x \in \mathbb{R}^d : \|x\| = r\}$ , and  $t(r) := \sup\{q(x) : x \in S_r\}$ , so that by assumption  $r^{d-1}t(r) \rightarrow 0$  as  $r \rightarrow \infty$ . Let  $\mathbb{1}_B(x) = 1$  if  $x \in B$  and 0 if  $x \notin B$ . Then  $\int \mathcal{S}_{p,q}h dp = \lim_{r \rightarrow \infty} \int \mathbb{1}_{B_r} \mathcal{S}_{p,q}h dp$  and, from the divergence theorem,

$$\begin{aligned} \int \mathbb{1}_{B_r} \mathcal{S}_{p,q}h dp &= \int \mathbb{1}_{B_r} \frac{q}{p} [\nabla \cdot h + h \cdot \nabla \log q] dp \\ &= \int_{B_r} [q \nabla \cdot h + h \cdot \nabla q] dx \\ &= \int_{B_r} \nabla \cdot (qh) dx \\ &= \oint_{S_r} qh \cdot n dx \leq t(r) \times \frac{2\pi^{d/2}}{\Gamma(d/2)} r^{d-1} \xrightarrow{r \rightarrow \infty} 0, \end{aligned}$$

as required.  $\square$

*Proof of Proposition 2.* Since  $k$  and its first derivatives are bounded, we can set

$$C_0^k := \sup_{x \in \mathbb{R}^d} \sqrt{k(x, x)}, \quad C_1^k := \sup_{x \in \mathbb{R}^d} \sqrt{\sum_{i=1}^d (\partial_i \otimes \partial_i) k(x, x)}.$$

From Cauchy–Schwarz and the reproducing property, for any  $f \in \mathcal{H}(k)$  it holds that  $|f(x)| = |\langle f, k(\cdot, x) \rangle_{\mathcal{H}(k)}| \leq \|f\|_{\mathcal{H}(k)} \|k(\cdot, x)\|_{\mathcal{H}(k)} = \|f\|_{\mathcal{H}(k)} \sqrt{\langle k(\cdot, x), k(\cdot, x) \rangle_{\mathcal{H}(k)}} = \|f\|_{\mathcal{H}(k)} \sqrt{k(x, x)}$ . Furthermore, using the fact that  $k$  is continuously differentiable, it can be shown that  $|\partial_i f(x)| \leq \|f\|_{\mathcal{H}(k)} \sqrt{(\partial_i \otimes \partial_i) k(x, x)}$ ; see Corollary 4.36 of Steinwart and Christmann [2008]. As a consequence, for all  $h \in \mathcal{H}(k)^d$  we have that, for all  $x \in \mathbb{R}^d$ ,

$$\begin{aligned} \|h(x)\| &= \sqrt{\sum_{i=1}^d h_i(x)^2} \leq \sqrt{\sum_{i=1}^d k(x, x) \|h_i\|_{\mathcal{H}(k)}^2} = C_0^k \|h\|_{\mathcal{H}(k)^d} \\ |\nabla \cdot h(x)| &= \left| \sum_{i=1}^d \partial_{x_i} h_i(x) \right| \leq \left| \sum_{i=1}^d \sqrt{(\partial_i \otimes \partial_i) k(x, x)} \|h_i\|_{\mathcal{H}(k)} \right| \leq C_1^k \|h\|_{\mathcal{H}(k)^d}. \end{aligned}$$

To use analogous notation as in the proof of Proposition 1, set  $C_0 := C_0^k \|h\|_{\mathcal{H}(k)^d}$  and  $C_1 := C_1^k \|h\|_{\mathcal{H}(k)^d}$ . Then, using Hölder's inequality and the fact that  $(a+b)^\beta \leq 2^{\beta-1}(a^\beta + b^\beta)$  with  $\beta = \alpha/(\alpha-1)$ , we have

$$\begin{aligned} \|\mathcal{S}_{p,q}h\|_{L^1(\pi)} &= \int |\mathcal{S}_{p,q}h| \, d\pi = \int \left| \frac{q}{p} [\nabla \cdot h + h \cdot \nabla \log q] \right| \, d\pi \\ &\leq \left( \int \left( \frac{q}{p} \right)^\alpha \, d\pi \right)^{\frac{1}{\alpha}} \left( \int (\nabla \cdot h + h \cdot \nabla \log q)^{\frac{\alpha}{\alpha-1}} \, d\pi \right)^{\frac{\alpha-1}{\alpha}} \\ &\leq 2^{\frac{1}{\alpha}} \left( \int \left( \frac{q}{p} \right)^\alpha \, d\pi \right)^{\frac{1}{\alpha}} \left( C_1^{\frac{\alpha}{\alpha-1}} + C_0^{\frac{\alpha}{\alpha-1}} \int \|\nabla \log q\|^{\frac{\alpha}{\alpha-1}} \, d\pi \right)^{\frac{\alpha-1}{\alpha}} \\ &\leq 2^{\frac{1}{\alpha}} \|h\|_{\mathcal{H}(k)^d} \left( \int \left( \frac{q}{p} \right)^\alpha \, d\pi \right)^{\frac{\alpha-1}{\alpha}} \left( (C_1^k)^{\frac{\alpha}{\alpha-1}} + (C_0^k)^{\frac{\alpha}{\alpha-1}} \int \|\nabla \log q\|^{\frac{\alpha}{\alpha-1}} \, d\pi \right)^{\frac{\alpha-1}{\alpha}} \end{aligned}$$

as required.  $\square$

To prove obtain explicit computable formulae for the GF-KSD, two intermediate results are required:

**Proposition 4.** *Let  $k$  and  $\pi$  satisfy the preconditions of Proposition 2. Then the function*

$$\mathbb{R}^d \ni x \mapsto f(x) := \frac{q(x)}{p(x)} [\nabla_x k(x, \cdot) + k(x, \cdot) \nabla \log q(x)] \quad (3)$$

*takes values in  $\mathcal{H}(k)^d$ , is Bochner  $\pi$ -integrable and, thus,  $\xi := \int f \, d\pi \in \mathcal{H}(k)^d$ .*

*Proof.* Since  $k$  has continuous first derivatives  $x \mapsto (\partial_i \otimes \partial_i)k(x, x)$ , Lemma 4.34 of Steinwart and Christmann [2008] gives that  $(\partial_i \otimes 1)k(x, \cdot) \in \mathcal{H}(k)$ , and, thus  $f \in \mathcal{H}(k)^d$ . Furthermore,  $f : \mathbb{R}^d \rightarrow \mathcal{H}(k)^d$  is Bochner  $\pi$ -integrable since

$$\begin{aligned} \int \|f(x)\|_{\mathcal{H}(k)^d} \, d\pi(x) &= \int \frac{q(x)}{p(x)} \|\nabla_x k(x, \cdot) + k(x, \cdot) \nabla \log q(x)\|_{\mathcal{H}(k)^d} \, d\pi(x) \\ &\leq \left( \int \left( \frac{q}{p} \right)^\alpha \, d\pi \right)^{\frac{1}{\alpha}} \left( \int \|\nabla_x k(x, \cdot) + k(x, \cdot) \nabla \log q(x)\|_{\mathcal{H}(k)^d}^{\frac{\alpha}{\alpha-1}} \, d\pi(x) \right)^{\frac{\alpha-1}{\alpha}} \\ &\leq 2^{\frac{1}{\alpha}} \left( \int \left( \frac{q}{p} \right)^\alpha \, d\pi \right)^{\frac{1}{\alpha}} \left( (C_1^k)^{\frac{\alpha}{\alpha-1}} + (C_0^k)^{\frac{\alpha}{\alpha-1}} \int \|\nabla \log q\|^{\frac{\alpha}{\alpha-1}} \, d\pi \right)^{\frac{\alpha-1}{\alpha}} < \infty \end{aligned}$$

where we have employed the same  $C_0^k$  and  $C_1^k$  notation as used in the proof of Proposition 2. Thus, from the definition of the Bochner integral,  $\xi = \int f \, d\pi$  exists and is an element of  $\mathcal{H}(k)^d$ .  $\square$

**Proposition 5.** *Let  $k$  and  $\pi$  satisfy the preconditions of Proposition 2. Then*

$$D_{p,q}(\pi)^2 = \iint \frac{q(x)}{p(x)} \frac{q(y)}{p(y)} k_q(x, y) \, d\pi(x) d\pi(y) \quad (4)$$

where

$$\begin{aligned} k_q(x, y) &= \nabla_x \cdot \nabla_y k(x, y) + \langle \nabla_x k(x, y), \nabla_y \log q(y) \rangle + \langle \nabla_y k(x, y), \nabla_x \log q(x) \rangle \\ &\quad + k(x, y) \langle \nabla_x \log q(x), \nabla_y \log q(y) \rangle. \end{aligned} \quad (5)$$

*Proof.* Let  $f$  be as in Equation (3). From Proposition 4,  $\xi = \int f \, d\pi \in \mathcal{H}(k)^d$ . Moreover, since  $f$  is Bochner  $\pi$ -integrable and  $Tf = \langle h, f \rangle_{\mathcal{H}(k)^d}$  is a continuous linear functional on  $\mathcal{H}(k)^d$ , from basic properties of Bochner integrals we have  $T\xi = T \int f \, d\pi = \int Tf \, d\pi$ . In particular,

$$\begin{aligned} \langle h, \xi \rangle_{\mathcal{H}(k)^d} &= \left\langle h, \int \frac{q(x)}{p(x)} [\nabla_x k(x, \cdot) + k(x, \cdot) \nabla \log q(x)] \, d\pi(x) \right\rangle_{\mathcal{H}(k)^d} \\ &= \int \frac{q(x)}{p(x)} [\nabla_x \langle h, k(x, \cdot) \rangle_{\mathcal{H}(k)^d} + \langle h, k(x, \cdot) \rangle_{\mathcal{H}(k)^d} \nabla \log q(x)] \, d\pi(x) \\ &= \int \frac{q(x)}{p(x)} [\nabla \cdot h(x) + h(x) \cdot \nabla \log q(x)] \, d\pi(x) = \int \mathcal{S}_{p,q}h \, d\pi(x) \end{aligned}$$

which shows that  $\xi$  is the Riesz representer of the bounded linear functional  $h \mapsto \int \mathcal{S}_{p,q} h \, d\pi$  on  $\mathcal{H}(k)^d$ . It follows from Cauchy–Schwarz that the (squared) operator norm of this functional is

$$\begin{aligned} D_{p,q}(\pi)^2 &= \|\xi\|_{\mathcal{H}(k)^d}^2 = \langle \xi, \xi \rangle_{\mathcal{H}(k)^d} = \left\langle \int \frac{q(x)}{p(x)} [\nabla_x k(x, \cdot) + k(x, \cdot) \nabla \log q(x)] \, d\pi(x), \right. \\ &\quad \left. \int \frac{q(y)}{p(y)} [\nabla_y k(y, \cdot) + k(y, \cdot) \nabla \log q(y)] \, d\pi(y) \right\rangle_{\mathcal{H}(k)^d} \\ &= \iint \frac{q(x)}{p(x)} \frac{q(y)}{p(y)} k_q(x, y) \, d\pi(x) d\pi(y) \end{aligned}$$

as claimed.  $\square$

For concreteness, we instantiate Proposition 5 in the specific case of the inverse multi-quadric kernel, since this is the kernel that we recommend in Section 2.2:

**Corollary 1** (Explicit Form). *For  $p, q$ , and  $\pi$  satisfying the preconditions of Proposition 2, and  $k$  the inverse multi-quadric kernel in Equation (2), we have that*

$$\begin{aligned} D_{p,q}(\pi)^2 &= \iint \frac{q(x)q(y)}{p(x)p(y)} \left\{ \frac{4\beta(\beta+1)\|x-y\|^2}{(\sigma^2 + \|x-y\|^2)^{\beta+2}} + 2\beta \left[ \frac{d + \langle \nabla \log q(x) - \nabla \log q(y), x-y \rangle}{(\sigma^2 + \|x-y\|^2)^{1+\beta}} \right] \right. \\ &\quad \left. + \frac{\langle \nabla \log q(x), \nabla \log q(y) \rangle}{(\sigma^2 + \|x-y\|^2)^\beta} \right\} d\pi(x) d\pi(y) \end{aligned} \quad (6)$$

*Proof of Corollary 1.* First we compute derivatives of the kernel  $k$  in Equation (2):

$$\begin{aligned} \nabla_x k(x, y) &= -\frac{2\beta}{(\sigma^2 + \|x-y\|^2)^{\beta+1}} (x-y) \\ \nabla_y k(x, y) &= \frac{2\beta}{(\sigma^2 + \|x-y\|^2)^{\beta+1}} (x-y) \\ \nabla_x \cdot \nabla_y k(x, y) &= -\frac{4\beta(\beta+1)\|x-y\|^2}{(\sigma^2 + \|x-y\|^2)^{\beta+2}} + \frac{2\beta d}{(\sigma^2 + \|x-y\|^2)^{\beta+1}} \end{aligned}$$

Letting  $u(x) := \nabla \log q(x)$  form a convenient shorthand, we have that

$$\begin{aligned} k_q(x, y) &:= \nabla_x \cdot \nabla_y k(x, y) + \langle \nabla_x k(x, y), u(y) \rangle + \langle \nabla_y k(x, y), u(x) \rangle + k(x, y) \langle u(x), u(y) \rangle \\ &= -\frac{4\beta(\beta+1)\|x-y\|^2}{(\sigma^2 + \|x-y\|^2)^{\beta+2}} + 2\beta \left[ \frac{d + \langle u(x) - u(y), x-y \rangle}{(\sigma^2 + \|x-y\|^2)^{1+\beta}} \right] + \frac{\langle u(x), u(y) \rangle}{(\sigma^2 + \|x-y\|^2)^\beta} \end{aligned}$$

which, combined with Proposition 5, gives the result.  $\square$

In addition to the results in the main text, here we present a spectral characterisation of GF-KSD. The following result was inspired by an impressive recent contribution to the literature on kernel Stein discrepancy due to Wynne et al. [2022], and our (informal) proof is based on an essentially identical argument:

**Proposition 6** (Spectral Characterisation). *Consider a positive definite isotropic kernel  $k$ , and recall that Bochner’s theorem guarantees  $k(x, y) = \int e^{-i\langle s, x-y \rangle} d\mu(s)$  for some  $\mu \in \mathcal{P}(\mathbb{R}^d)$ . Then, under regularity conditions that we leave implicit,*

$$D_{p,q}(\pi)^2 = \int \left\| \int \frac{1}{p(x)} \left\{ e^{-i\langle s, x \rangle} \nabla q(x) - i s e^{-i\langle s, x \rangle} q(x) \right\} d\pi(x) \right\|_{\mathbb{C}}^2 d\mu(s). \quad (7)$$

The Fourier transform  $\widehat{\nabla q}$  of  $\nabla q$  is defined as  $\int e^{-i\langle s, x \rangle} \nabla q(x) \, dx$ , and a basic property of the Fourier transform is that the transform of a derivative can be computed using the expression  $i s \int e^{-i\langle s, x \rangle} q(x) \, dx$ . This implies that the inner integral in (7) vanishes when  $\pi$  and  $p$  are equal. Thus we can interpret GF-KSD as a quantification of the uniformity of  $d\pi/dp$ , with a weighting function based on the Fourier derivative identity with regard to  $\nabla q$ .

*Proof of Proposition 6.* From direct calculation, and assuming derivatives and integrals can be interchanged, we have that

$$\nabla_x k(x, y) = - \int i s e^{-i\langle s, x-y \rangle} d\mu(s), \quad (8)$$

$$\nabla_y k(x, y) = \int i s e^{-i\langle s, x-y \rangle} d\mu(s), \quad (9)$$

$$\nabla_x \cdot \nabla_y k(x, y) = \int \|s\|^2 e^{-i\langle s, x-y \rangle} d\mu(s). \quad (10)$$

Now, let

$$\eta(x, s) = \frac{1}{p(x)} \left\{ e^{-i\langle s, x \rangle} \nabla q(x) - i s e^{-i\langle s, x \rangle} q(x) \right\} = \frac{q(x)}{p(x)} \left\{ e^{-i\langle s, x \rangle} \nabla \log q(x) - i s e^{-i\langle s, x \rangle} \right\}$$

and note through direct calculation and Equations (8) to (10) that

$$\begin{aligned} & \int \eta(x, s) \cdot \overline{\eta(y, s)} d\mu(s) \\ &= \frac{q(x)}{p(x)} \frac{q(y)}{p(y)} \int \left\{ \|s\|^2 + i s \cdot \nabla \log q(x) - i s \cdot \nabla \log q(y) + \nabla \log q(x) \cdot \nabla \log q(y) \right\} e^{-i\langle s, x-y \rangle} d\mu(s) \\ &= \frac{q(x)}{p(x)} \frac{q(y)}{p(y)} \left\{ \begin{aligned} & \nabla_x \cdot \nabla_y k(x, y) + \nabla_y k(x, y) \cdot \nabla \log q(x) \\ & + \nabla_x k(x, y) \cdot \nabla \log q(y) + k(x, y) \nabla \log q(x) \cdot \nabla \log q(y) \end{aligned} \right\} \\ &= \frac{q(x)}{p(x)} \frac{q(y)}{p(y)} k_q(x, y). \end{aligned}$$

Thus, integrating with respect to  $\pi$ , and assuming that we may interchange the order of integrals, we have that

$$\begin{aligned} \int \left\| \int \eta(x, s) d\pi(x) \right\|_{\mathbb{C}}^2 d\mu(s) &= \int \iint \eta(x, s) \cdot \overline{\eta(y, s)} d\pi(x) d\pi(y) d\mu(s) \\ &= \iint \int \eta(x, s) \cdot \overline{\eta(y, s)} d\mu(s) d\pi(x) d\pi(y) \\ &= \iint \frac{q(x)}{p(x)} \frac{q(y)}{p(y)} k_q(x, y) d\pi(x) d\pi(y) = D_{p,q}(\pi)^2, \end{aligned}$$

where the final equality is Proposition 5. This establishes the result.  $\square$

To prove Theorem 1, two intermediate results are required:

**Proposition 7.** *For an element  $\pi \in \mathcal{P}(\mathbb{R}^d)$ , assume  $Z := \int (q/p) d\pi \in (0, \infty)$ . Assume that  $k$  and  $\pi$  satisfy the preconditions of Proposition 2, and that  $\int \|\nabla \log q\|^{\alpha/(\alpha-1)} (q/p) d\pi < \infty$ . Let  $\bar{\pi} := (q\pi)/(pZ)$ . Then  $\bar{\pi} \in \mathcal{P}(\mathbb{R}^d)$  and*

$$D_{p,q}(\pi) = Z D_{q,q}(\bar{\pi}).$$

*Proof.* The assumption  $Z \in (0, \infty)$  implies that  $\bar{\pi} \in \mathcal{P}(\mathbb{R}^d)$ . Furthermore, the assumption  $\int \|\nabla \log q\|^{\alpha/(\alpha-1)} (q/p) d\pi < \infty$  implies that  $\int \|\nabla \log q\|^{\alpha/(\alpha-1)} d\bar{\pi} < \infty$ . Thus the assumptions of Proposition 2 are satisfied for both  $\pi$  and  $\bar{\pi}$ , and thus both  $D_{p,q}(\pi)$  and  $D_{q,q}(\bar{\pi})$  are well-defined. Now, with  $\xi$  as in Proposition 4, notice that

$$\begin{aligned} D_{p,q}(\pi) &= \|\xi\|_{\mathcal{H}(k)^s} = \left\| \int \frac{q(x)}{p(x)} [\nabla k(x, \cdot) + k(x, \cdot) \nabla \log q(x)] d\pi(x) \right\|_{\mathcal{H}(k)^d} \\ &= \left\| \int [\nabla k(x, \cdot) + k(x, \cdot) \nabla \log q(x)] Z d\bar{\pi}(x) \right\|_{\mathcal{H}(k)^d} = Z D_{q,q}(\bar{\pi}), \end{aligned}$$

as claimed.  $\square$

**Proposition 8.** *Let  $f : \mathbb{R}^d \rightarrow [0, \infty)$  and  $\pi \in \mathcal{P}(\mathbb{R}^d)$ . Then  $\int f^\alpha d\pi > 0 \Rightarrow \int f d\pi > 0$ , for all  $\alpha \in (0, \infty)$ .*

*Proof.* From the definition of the Lebesgue integral, we have that  $\int f^\alpha d\pi = \sup\{\int s d\pi : s \text{ a simple function with } 0 \leq s \leq f^\alpha\} > 0$ . Thus there exists a simple function  $s = \sum_{i=1}^m s_i 1_{S_i}$  with  $0 \leq s \leq f^\alpha$  and  $\int s d\pi > 0$ . Here the  $s_i \in \mathbb{R}$  and the measurable sets  $S_i \subset \mathbb{R}^d$  are disjoint. In particular, it must be the case that at least one of the coefficients  $s_i$  is positive; without loss of generality suppose  $s_1 > 0$ . Then  $\tilde{s} := s_1^{1/\alpha} 1_{S_1}$  is a simple function with  $0 \leq \tilde{s} \leq f$  and  $\int \tilde{s} d\pi > 0$ . It follows that  $\int f d\pi = \sup\{\int s d\pi : s \text{ a simple function with } 0 \leq s \leq f\} > 0$ .  $\square$

*Proof of Theorem 1.* Since  $\int (q/p)^\alpha d\pi_n \in (0, \infty)$  and  $q/p \geq 0$ , from Proposition 8 we have, for each  $n$ , that  $Z_n := \int q/p d\pi_n > 0$ . Thus the assumptions of Proposition 7 are satisfied by  $k$  and each  $\pi_n$ , which guarantees that  $D_{p,q}(\pi_n) = Z_n D_{q,q}(\bar{\pi}_n)$  where  $\bar{\pi}_n := (q\pi_n)/(pZ_n) \in \mathcal{P}(\mathbb{R}^d)$ .

Now, since  $W_1(\pi_n, p; q/p) \rightarrow 0$ , taking  $f = 1$  we obtain  $Z_n = \int f q/p d\pi_n \rightarrow \int f q/p dp = 1$ . In addition, note that

$$\begin{aligned} W_1(\bar{\pi}_n, q) &= \sup_{\substack{L(f) \leq 1 \\ f(0)=0}} \left| \int f d\bar{\pi}_n - \int f dq \right| \\ &= \sup_{\substack{L(f) \leq 1 \\ f(0)=0}} \left| \int [f(0) + [f(x) - f(0)]] d\bar{\pi}_n(x) - \int [f(0) + [f(x) - f(0)]] dq(x) \right| \\ &= \sup_{\substack{L(f) \leq 1 \\ f(0)=0}} \left| \int [f(x) - f(0)] d\bar{\pi}_n(x) - \int [f(x) - f(0)] dq(x) \right| \\ &= \sup_{\substack{L(f) \leq 1 \\ f(0)=0}} \left| \int f d\bar{\pi}_n - \int f dq \right| \end{aligned}$$

Thus, from the triangle inequality, we obtain the bound

$$\begin{aligned} W_1(\bar{\pi}_n, q) &= \sup_{\substack{L(f) \leq 1 \\ f(0)=0}} \left| \int f d\bar{\pi}_n - \int f dq \right| \\ &= \sup_{\substack{L(f) \leq 1 \\ f(0)=0}} \left| \int \frac{fq}{pZ_n} d\pi_n - \int \frac{fq}{p} dp \right| \\ &\leq \sup_{\substack{L(f) \leq 1 \\ f(0)=0}} \left| \int \frac{fq}{pZ_n} d\pi_n - \int \frac{fq}{p} d\pi_n \right| + \sup_{\substack{L(f) \leq 1 \\ f(0)=0}} \left| \int \frac{fq}{p} d\pi_n - \int \frac{fq}{p} dp \right| \\ &= \underbrace{\left( \frac{1 - Z_n}{Z_n} \right)}_{\rightarrow 0} \underbrace{\sup_{\substack{L(f) \leq 1 \\ f(0)=0}} \left| \int \frac{fq}{p} d\pi_n \right|}_{(*)} + \underbrace{W_1\left(\pi_n, p; \frac{q}{p}\right)}_{\rightarrow 0} \end{aligned}$$

as  $n \rightarrow \infty$ . For (\*), since  $q/p \geq 0$ , the supremum is realised by  $f(x) = \|x\|$  and

$$(*) = \int \|x\| \frac{q(x)}{p(x)} d\pi_n(x) < \infty.$$

Thus we have established that  $W_1(\bar{\pi}_n, q) \rightarrow 0$ . Since  $\nabla \log q$  is Lipschitz with  $\int \|\nabla \log q\|^2 dq < \infty$  and  $k$  has continuous and bounded second derivatives, the standard kernel Stein discrepancy has 1-Wasserstein convergence detection [Proposition 9 of Gorham and Mackey, 2017], meaning that  $W_1(\bar{\pi}_n, q) \rightarrow 0$  implies that  $D_{q,q}(\bar{\pi}_n) \rightarrow 0$  and thus, since  $Z_n \rightarrow 1$ ,  $D_{p,q}(\pi_n) \rightarrow 0$ . This completes the proof.  $\square$

To prove Proposition 3, an intermediate result is required:

**Proposition 9.** *Let  $k(x, y) = \phi(x - y)$  be a kernel with  $\phi$  twice differentiable and let  $q \in \mathcal{P}(\mathbb{R}^d)$  with  $\nabla \log q$  well-defined. Then  $k_q(x, x) = -\Delta\phi(0) + \phi(0)\|\nabla \log q(x)\|^2$ , where  $\Delta = \nabla \cdot \nabla$  and  $k_q$  was defined in Proposition 5.*

*Proof.* First, note that we must have  $\nabla\phi(0) = 0$ , else the symmetry property of  $k$  would be violated. Now,  $\nabla_x k(x, y) = (\nabla\phi)(x - y)$ ,  $\nabla_y k(x, y) = -(\nabla\phi)(x - y)$  and  $\nabla_x \cdot \nabla_y k(x, y) = -\Delta\phi(x - y)$ . Thus  $\nabla_x k(x, y)|_{y=x} = \nabla_y k(x, y)|_{x=y} = 0$  and  $\nabla_x \cdot \nabla_y k(x, y)|_{x=y} = -\Delta\phi(0)$ . Plugging these expressions into Equation (5) yields the result.  $\square$

*Proof of Proposition 3.* Let  $k_q$  be defined as in Proposition 5. From Cauchy–Schwarz, we have that  $k_q(x, y) \leq \sqrt{k_q(x, x)}\sqrt{k_q(y, y)}$ , and plugging this into Proposition 5 we obtain the bound

$$D_{p,q}(\pi) \leq \int \frac{q(x)}{p(x)} \sqrt{k_q(x, x)} \, d\pi(x) \quad (11)$$

For a radial kernel  $k(x, y) = \phi(x - y)$  with  $\phi$  twice differentiable, we have  $\phi(0) > 0$  (else  $k$  must be the zero kernel, since by Cauchy–Schwarz  $|k(x, y)| \leq \sqrt{k(x, x)}\sqrt{k(y, y)} = \phi(0)$  for all  $x, y \in \mathbb{R}^d$ ), and  $k_q(x, x) = -\Delta\phi(0) + \phi(0)\|\nabla \log q(x)\|^2$  (from Proposition 9). Plugging this expression into Equation (11) and applying Jensen’s inequality gives that

$$D_{p,q}(\pi)^2 \leq \int \frac{q(x)^2}{p(x)^2} [-\Delta\phi(0) + \phi(0)\|\nabla \log q(x)\|^2] \, d\pi(x).$$

Now we may pick a choice of  $p, q$  and  $(\pi_n)_{n \in \mathbb{N}}$  ( $\pi_n \xrightarrow{d} p$ ) for which this bound can be made arbitrarily small. One example is  $q = \mathcal{N}(0, 1)$ ,  $p = \mathcal{N}(0, \sigma^2)$  (any fixed  $\sigma > 1$ ), for which we have

$$D_{p,q}(\pi)^2 \leq \int \sigma^2 \exp(-\gamma\|x\|^2) [-\Delta\phi(0) + \phi(0)\|x\|^2] \, d\pi(x)$$

where  $\gamma = 1 - \sigma^{-2} > 0$ . Then it is clear that, for example, the sequence  $\pi_n = \delta(ne_1)$  (where  $e_1 = [1, 0, \dots, 0]^\top$ ) satisfies the assumptions of Proposition 2 and, for this choice,

$$D_{p,q}(\pi_n)^2 \leq \sigma^2 \exp(-\gamma n^2) [-\Delta\phi(0) + \phi(0)n^2] \rightarrow 0$$

and yet  $\pi_n \xrightarrow{d} p$ , as claimed.  $\square$

*Proof of Theorem 2.* Since  $\inf_{x \in \mathbb{R}^d} q(x)/p(x) > 0$ , for each  $n$  we have  $Z_n := \int q/p \, d\pi_n > 0$  and, furthermore, the assumption  $\int \|\nabla \log q\|^{\alpha/(\alpha-1)} (q/p) \, d\pi_n < \infty$  implies that  $\int \|\nabla \log q\|^{\alpha/(\alpha-1)} \, d\pi_n < \infty$ . Thus the assumptions of Proposition 7 are satisfied by  $k$  and each  $\pi_n$ , and thus we have  $D_{p,q}(\pi_n) = Z_n D_{q,q}(\bar{\pi}_n)$  where  $\bar{\pi}_n := (q\pi_n)/(pZ_n) \in \mathcal{P}(\mathbb{R}^d)$ .

From assumption,  $Z_n \geq \inf_{x \in \mathbb{R}^d} q(x)/p(x)$  is bounded away from 0. Thus if  $D_{p,q}(\pi_n) \rightarrow 0$  then  $D_{q,q}(\bar{\pi}_n) \rightarrow 0$ . Furthermore, since  $q \in \mathcal{Q}(\mathbb{R}^d)$  and the inverse multi-quadric kernel  $k$  is used, the standard kernel Stein discrepancy has convergence control, meaning that  $D_{q,q}(\bar{\pi}_n) \rightarrow 0$  implies  $\bar{\pi}_n \xrightarrow{d} q$  [Theorem 8 of Gorham and Mackey, 2017]. It therefore suffices to show that  $\bar{\pi}_n \xrightarrow{d} q$  implies  $\pi_n \xrightarrow{d} p$ .

From the Portmanteau theorem,  $\pi_n \xrightarrow{d} p$  is equivalent to  $\int g \, d\pi_n \rightarrow \int g \, dp$  for all functions  $g$  which are continuous and bounded. Thus, for an arbitrary continuous and bounded function  $g$ , consider  $f = gp/q$ , which is also continuous and bounded. Then, since  $\bar{\pi}_n \xrightarrow{d} q$ , we have (again from the Portmanteau theorem) that  $Z_n^{-1} \int g \, d\pi_n = \int f \, d\bar{\pi}_n \rightarrow \int f \, dq = \int g \, dp$ . Furthermore, the specific choice  $g = 1$  shows that  $Z_n^{-1} \rightarrow 1$ , and thus  $\int g \, d\pi_n \rightarrow \int g \, dp$  in general. Since  $g$  was arbitrary, we have established that  $\pi_n \xrightarrow{d} p$ , completing the proof.  $\square$

To prove Theorem 3, an intermediate result is required:

**Proposition 10.** *Let  $Q \in \mathcal{P}(\mathbb{R}^d)$  and let  $k_q : \mathbb{R}^d \times \mathbb{R}^d \rightarrow \mathbb{R}$  be a reproducing kernel with  $\int k_q(x, \cdot) \, dq = 0$  for all  $x \in \mathbb{R}^d$ . Let  $(x_n)_{n \in \mathbb{N}}$  be a sequence of random variables independently sampled from  $q$  and assume that  $\int \exp\{\gamma k_q(x, x)\} \, dq(x) < \infty$  for some  $\gamma > 0$ . Then*

$$D_{q,q} \left( \frac{1}{n} \sum_{i=1}^n \delta(x_i) \right) \rightarrow 0$$

almost surely as  $n \rightarrow \infty$ .

*Proof.* This is Lemma 4 in Riabiz et al. [2022], specialised to the case where samples are independent and identically distributed. Although not identical to the statement in Riabiz et al. [2022], one obtains this result by following an identical argument and noting that the expectation of  $k_q(x_i, x_j)$  is identically 0 when  $i \neq j$  (due to independence of  $x_i$  and  $x_j$ ), so that bounds on these terms are not required.  $\square$

*Proof of Theorem 3.* Since  $\pi_n$  has finite support, all conditions of Theorem 2 are satisfied. Thus it is sufficient to show that almost surely  $D_{p,q}(\pi_n) \rightarrow 0$ . To this end, we follow Theorem 3 of Riabiz et al. [2022] and introduce the classical importance weights  $w_i = p(x_i)/q(x_i)$ , which are well-defined since  $q > 0$ . The normalised weights  $\bar{w}_i = w_i/W_n$ ,  $W_n := \sum_{j=1}^n w_j$  satisfy  $0 \leq \bar{w}_1, \dots, \bar{w}_n$  and  $\bar{w}_1 + \dots + \bar{w}_n = 1$ , and thus the optimality of  $w^*$ , together with the integral form of the GF-KSD in Equation (4), gives that

$$\begin{aligned} D_{p,q} \left( \sum_{i=1}^n w_i^* \delta(x_i) \right) &\leq D_{p,q} \left( \sum_{i=1}^n \bar{w}_i \delta(x_i) \right) = \frac{1}{W_n} \sqrt{\sum_{i=1}^n \sum_{j=1}^n k_q(x_i, x_j)} \\ &= \left( \frac{1}{n} W_n \right)^{-1} D_{q,q} \left( \frac{1}{n} \sum_{i=1}^n \delta(x_i) \right) \end{aligned} \quad (12)$$

From the strong law of large numbers, almost surely  $n^{-1}W_n \rightarrow \int \frac{p}{q} dq = 1$ . Thus it suffices to show that the final term in Equation (12) converges almost surely to 0. To achieve this, we can check the conditions of Proposition 10 are satisfied.

Since  $q$  and  $h(\cdot) = \mathcal{S}_{p,q}k(x, \cdot)$  satisfy the conditions of Proposition 1, the condition  $\int k_q(x, \cdot) dq = 0$  is satisfied. Let  $\phi(z) = (1 + \|z\|^2)^{-\beta}$  so that  $k(x, y) = \phi(x - y)$  is the inverse multi-quadric kernel. Note that  $\phi(0) = 1$  and  $\Delta\phi(0) = -d$ . Then, from Proposition 9, we have that  $k_q(x, x) = -\Delta\phi(0) + \phi(0)\|\nabla \log q\|^2 = d + \|\nabla \log q\|^2$ . Then

$$\int \exp\{\gamma k_q(x, x)\} dq(x) = \exp\{\gamma d\} \int \exp\{\gamma \|\nabla \log q\|^2\} dq < \infty,$$

which establishes that the conditions of Proposition 10 are satisfied and completes the proof.  $\square$

## B Stein Variational Inference Without Second-Order Gradient

This section contains sufficient conditions for unbiased stochastic gradient estimators to exist in the context of Stein Variational Inference; see Section 4.2 of the main text. The main result that we prove is as follows:

**Proposition 11** (Stochastic Gradients). *Let  $p, q, R \in \mathcal{P}(\mathbb{R}^d)$  and  $T^\theta : \mathbb{R}^d \rightarrow \mathbb{R}^d$  for each  $\theta \in \mathbb{R}^p$ . Let  $\theta \mapsto \nabla_\theta T^\theta(x)$  be bounded. Assume that for each  $\vartheta \in \mathbb{R}^p$  there is an open neighbourhood  $N_\vartheta \subset \mathbb{R}^p$  such that*

$$\begin{aligned} \int \sup_{\theta \in N_\vartheta} \left( \frac{q(T^\theta(x))}{p(T^\theta(x))} \right)^2 dR(x) &< \infty, \\ \int \sup_{\theta \in N_\vartheta} \frac{q(T^\theta(x))}{p(T^\theta(x))} \|\nabla \log r(T^\theta(x))\| dR(x) &< \infty, \\ \int \sup_{\theta \in N_\vartheta} \frac{q(T^\theta(x))}{p(T^\theta(x))} \|\nabla^2 \log r(T^\theta(x))\| dR(x) &< \infty, \end{aligned}$$

for each of  $r \in \{p, q\}$ . Let  $k$  be the inverse multi-quadric kernel in Equation (2) and let  $u(x, y)$  denote the integrand in Equation (6). Then

$$\nabla_\theta D_{p,q}(\pi_\theta)^2 = \mathbb{E} \left[ \frac{1}{n(n-1)} \sum_{i \neq j} \nabla_\theta u(T^\theta(x_i), T^\theta(x_j)) \right]$$

where the expectation is taken with respect to independent samples  $x_1, \dots, x_n \sim R$ .

The role of Proposition 11 is to demonstrate how an unbiased gradient estimator may be constructed, whose computation requires first-order derivatives of  $p$  only, and whose cost is  $O(n^2)$ . Although the assumption that  $\theta \mapsto \nabla_\theta T^\theta(x)$  is bounded seems strong, it can typically be satisfied by reparametrisation of  $\theta \in \mathbb{R}^p$ .

To prove Proposition 11, we exploit the following general result due to Fisher et al. [2021]:

**Proposition 12.** *Let  $R \in \mathcal{P}(\mathbb{R}^p)$ . Let  $\Theta \subseteq \mathbb{R}^p$  be an open set and let  $u : \mathbb{R}^d \times \mathbb{R}^d \rightarrow \mathbb{R}$ ,  $T^\theta : \mathbb{R}^d \rightarrow \mathbb{R}^d$ ,  $\theta \in \Theta$ , be functions such that, for all  $\vartheta \in \Theta$ ,*

$$(A1) \quad \iint |u(T^\vartheta(x), T^\vartheta(y))| \, dR(x)dR(y) < \infty;$$

(A2) *there exists an open neighbourhood  $N_\vartheta \subset \Theta$  of  $\vartheta$  such that*

$$\iint \sup_{\theta \in N_\vartheta} \|\nabla_\theta u(T^\theta(x), T^\theta(y))\| \, dR(x)dR(y) < \infty.$$

Then  $F(\theta) := \iint u(T^\theta(x), T^\theta(y)) \, dR(x)dR(y)$  is well-defined for all  $\theta \in \Theta$  and

$$\nabla_\theta F(\theta) = \mathbb{E} \left[ \frac{1}{n(n-1)} \sum_{i \neq j} \nabla_\theta u(T^\theta(x_i), T^\theta(x_j)) \right],$$

where the expectation is taken with respect to independent samples  $x_1, \dots, x_n \sim R$ .

*Proof.* This is Proposition 1 in Fisher et al. [2021]. □

*Proof of Proposition 11.* In what follows we aim to verify the conditions of Proposition 12 hold for the choice  $u(x, y) = k_q(x, y)$ , where  $k_q$  was defined in Equation (5).

(A1): From the first line in the proof of Proposition 4, the functions  $\mathcal{S}_{p,q}k(x, \cdot)$ ,  $x \in \mathbb{R}^d$ , are in  $\mathcal{H}(k)^d$ . Since  $(x, y) \mapsto u(x, y) = \langle \mathcal{S}_{p,q}k(x, \cdot), \mathcal{S}_{p,q}k(y, \cdot) \rangle_{\mathcal{H}(k)^d}$  is positive semi-definite, from Cauchy–Schwarz,  $|u(x, y)| \leq \sqrt{u(x, x)}\sqrt{u(y, y)}$ . Thus

$$\begin{aligned} \int |u(T^\theta(x), T^\theta(y))| \, dR(x)dR(y) &= \int |u(x, y)| \, dT_\#^\theta R(x)dT_\#^\theta R(y) \\ &\leq \left( \int \sqrt{u(x, x)} \, dT_\#^\theta R(x) \right)^2. \end{aligned}$$

Since  $k(x, y) = \phi(x - y)$ , we have from Proposition 9 that

$$u(x, x) = \left( \frac{q(x)}{p(x)} \right)^2 [-\Delta\phi(0) + \phi(0)\|\nabla \log q(x)\|^2]$$

and

$$\int \sqrt{u(x, x)} \, dT_\#^\theta R(x) \leq \sqrt{\int \left( \frac{q}{p} \right)^2 \, dT_\#^\theta R} \sqrt{\int |-\Delta\phi(0) + \phi(0)\|\nabla \log q\|^2| \, dT_\#^\theta R}$$

which is finite by assumption.

(A2): Fix  $x, y \in \mathbb{R}^d$  and let  $R_x(\theta) := q(T^\theta(x))/p(T^\theta(y))$ . From repeated application of the product rule of differentiation, we have that

$$\nabla_\theta u(T^\theta(x), T^\theta(y)) = \underbrace{k_q(T^\theta(x), T^\theta(y)) \nabla_\theta [R_x(\theta) R_y(\theta)]}_{(*)} + \underbrace{R_x(\theta) R_y(\theta) \nabla_\theta k_q(T^\theta(x), T^\theta(y))}_{(**)}.$$

Let  $b_p(x) := \nabla \log p(x)$ ,  $b_q(x) := \nabla \log q(x)$ ,  $b(x) := b_q(x) - b_p(x)$ , and  $[\nabla_\theta T^\theta(x)]_{i,j} = (\partial/\partial\theta_i)T_j^\theta(x)$ . In what follows, we employ a matrix norm on  $\mathbb{R}^{d \times d}$  which is consistent with the Euclidean norm on  $\mathbb{R}^d$ , meaning that  $\|\nabla_\theta T^\theta(x)b(T^\theta(x))\| \leq \|\nabla_\theta T^\theta(x)\| \|b(T^\theta(x))\|$  for each  $\theta \in \Theta$  and  $x \in \mathbb{R}^d$ . Considering the first term (\*), further applications of the chain rule yield that

$$\nabla_\theta [R_x(\theta) R_y(\theta)] = R_x(\theta) R_y(\theta) [\nabla_\theta T^\theta(x)b(T^\theta(x)) + \nabla_\theta T^\theta(y)b(T^\theta(y))]$$



and from the triangle inequality we obtain a bound

$$\|\nabla_\theta [R_x(\theta)R_y(\theta)]\| \leq R_x(\theta)R_y(\theta) [\|\nabla_\theta T^\theta(x)\| \|b(T^\theta(x))\| + \|\nabla_\theta T^\theta(y)\| \|b(T^\theta(y))\|].$$

Let  $\lesssim$  denote inequality up to an implicit multiplicative constant. Since we assumed that  $\|\nabla_\theta T^\theta(x)\|$  is bounded, and the inverse multi-quadric kernel  $k$  is bounded, we obtain that

$$|(*)| \lesssim R_x(\theta)R_y(\theta) [\|b(T^\theta(x))\| + \|b(T^\theta(y))\|].$$

Similarly, from Equation (5), and using also the fact that the inverse multi-quadric kernel  $k$  has derivatives of all orders [Lemma 4 of Fisher et al., 2021], we obtain a bound

$$\begin{aligned} \|\nabla_\theta k_q(T^\theta(x), T^\theta(y))\| &\lesssim [1 + \|b_q(T^\theta(x))\| + \|\nabla b_q(T^\theta(x))\|] [1 + \|b_q(T^\theta(y))\|] \\ &\quad + [1 + \|b_q(T^\theta(y))\| + \|\nabla b_q(T^\theta(y))\|] [1 + \|b_q(T^\theta(x))\|] \end{aligned}$$

which we multiply by  $R_x(\theta)R_y(\theta)$  to obtain a bound on  $(**)$ . Thus we have an overall bound

$$\begin{aligned} \|\nabla_\theta u(T^\theta(x), T^\theta(y))\| &\lesssim R_x(\theta)R_y(\theta) \{ [1 + \|b_q(T^\theta(x))\| + \|\nabla b_q(T^\theta(x))\|] [1 + \|b_q(T^\theta(y))\|] \\ &\quad + [1 + \|b_q(T^\theta(y))\| + \|\nabla b_q(T^\theta(y))\|] [1 + \|b_q(T^\theta(x))\|] \}. \end{aligned}$$

Substituting this bound into  $\iint \sup_{\theta \in N_\vartheta} \|\nabla_\theta u(T^\theta(x), T^\theta(y))\| \, dR(x)dR(y)$ , and factoring terms into products of single integrals, we obtain an explicit bound on this double integral in terms of the following quantities (where  $r \in \{p, q\}$ ):

$$\begin{aligned} &\int \sup_{\theta \in N_\vartheta} R_x(\theta) \, dR(x) \\ &\int \sup_{\theta \in N_\vartheta} R_x(\theta) \|b_r(T^\theta(x))\| \, dR(x) \\ &\int \sup_{\theta \in N_\vartheta} R_x(\theta) \|\nabla b_r(T^\theta(x))\| \, dR(x) \end{aligned}$$

which we have assumed exist.

Thus the conditions of Proposition 12 hold, and the result immediately follows.  $\square$

## C Experimental Details

These appendices contain the additional empirical results referred to in Section 3, together with full details required to reproduce the experiments described in Section 4 of the main text.

### C.1 Detection of Convergence and Non-Convergence

This appendix contains full details for the convergence plots of Figure 1. In Figure 1, we considered the target distribution

$$p(x) = \sum_{i=1}^3 w_i \mathcal{N}(x; \mu_i, \sigma_i^2),$$

where  $\mathcal{N}(x; \mu, \sigma^2)$  is the univariate Gaussian density with mean  $\mu$  and variance  $\sigma^2$ . The parameter choices used were  $(w_1, w_2, w_3) = (0.375, 0.5625, 0.0625)$ ,  $(\mu_1, \mu_2, \mu_3) = (-0.4, 0.3, 0.06)$  and  $(\sigma_1^2, \sigma_2^2, \sigma_3^2) = (0.2, 0.2, 0.9)$ .

The approximating sequences considered were location-scale sequences of the form  $L_{\#}^n u$ , where  $L^n(x) = a_n + b_n x$  for some  $(a_n)_{n \in \mathbb{N}}$  and  $(b_n)_{n \in \mathbb{N}}$  and  $u \in \mathcal{P}(\mathbb{R})$ . For the converging sequences, we set  $u = p$  and for the non-converging sequences, we set  $u = \mathcal{N}(0, 0.5)$ . We considered three different choices of  $(a_n)_{n \in \mathbb{N}}$  and  $(b_n)_{n \in \mathbb{N}}$ , one for each colour. The sequences  $(a_n)_{n \in \mathbb{N}}$  and  $(b_n)_{n \in \mathbb{N}}$  used are shown in Figure S1. The specification of our choices of  $q$  is the following:

- **Prior:** We took  $q \sim \mathcal{N}(0, 0.75^2)$ .
- **Laplace:** The Laplace approximation computed was  $q \sim \mathcal{N}(0.3, 0.2041^2)$ .

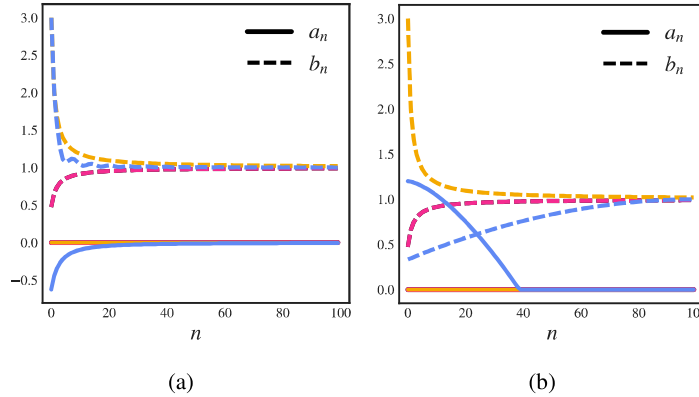

Figure S1: The sequences  $a_n$  and  $b_n$  used in the location-scale sequences. (a) The sequences  $a_n$  and  $b_n$  used in the location-scale sequences in Figure 1. (b) The sequences  $a_n$  and  $b_n$  used in the location-scale sequences in Figure 2. In each case, the colour used of each curve indicates which of the sequences  $(\pi)_{n \in \mathbb{N}}$  they correspond to.

- **GMM:** The Gaussian mixture model was computed using 100 samples from the target  $p$ . The number of components used was 2, since this value minimised the Bayes information criterion [Schwarz, 1978].
- **KDE:** The kernel density estimate was computed using 100 samples from the target  $p$ . We utilised a Gaussian kernel  $k(x, y) = \exp(-(x - y)^2 / \ell^2)$  with the lengthscale or bandwidth parameter  $\ell$  determined by Silverman’s rule of thumb [Silverman, 1986].

The values of GF-KSD reported in Figure 1 were computed using a quasi Monte Carlo approximation to the integral (6), utilising a length 300 low-discrepancy sequence. The low discrepancy sequences were obtained by first specifying a uniform grid over  $[0, 1]$  and then performing the inverse CDF transform for each member of the sequence  $\pi_n$ .

## C.2 Avoidance of Failure Modes

This appendix contains full details of the experiment reported in Section 3.3 and an explanation of the failure mode reported in Figure 2a. The sequences considered are displayed in Figure S2. Each sequence was a location-scale sequences of the form  $L_{\#}^n u$ , where  $L^n(x) = a_n + b_n x$  for some  $(a_n)_{n \in \mathbb{N}}$  and  $(b_n)_{n \in \mathbb{N}}$  and  $u \in \mathcal{P}(\mathbb{R})$ . For the converging sequences, we set  $u = p$ . The specification of the settings of each failure mode are as follows:

- **Failure mode (a)** [Figure 2a]: We took  $p$  as the target used in Figure 1 and detailed in Appendix C.1 and took  $q \sim \mathcal{N}(0, 1.5^2)$ . The  $a_n$  and  $b_n$  sequences used are displayed in Figure S1a. The values of GF-KSD reported were computed using a quasi Monte Carlo approximation, using a length 300 low discrepancy sequence. The low discrepancy sequences were obtained by first specifying a uniform grid over  $[0, 1]$  and then performing the inverse CDF transform for each member of the sequence  $\pi_n$ .
- **Failure mode (b)** [Figure 2b]: We took  $p \sim \mathcal{N}(0, 1)$  and  $q \sim \mathcal{N}(-0.7, 0.1^2)$ . The  $a_n$  and  $b_n$  sequences used are displayed in Figure S1b. The values of GF-KSD reported were computed using a quasi Monte Carlo approximation, using a length 300 low discrepancy sequence. The low discrepancy sequences were obtained by first specifying a uniform grid over  $[0, 1]$  and then performing the inverse CDF transform for each member of the sequence  $\pi_n$ .
- **Failure Mode (c)** [Figure 2c]: In each dimension  $d$  considered, we took  $p \sim \mathcal{N}(0, I)$  and  $q \sim \mathcal{N}(0, 1.1I)$ . The  $a_n$  and  $b_n$  sequences<sup>5</sup> used are displayed in Figure S1b. The values of GF-KSD reported were computed using a quasi Monte Carlo approximation, using a length 1,024 Sobol sequence in each dimension  $d$ .

<sup>5</sup>Note that for  $d > 1$ , we still considered location-scale sequences of the form  $L^n(x) = a_n + b_n x$ .

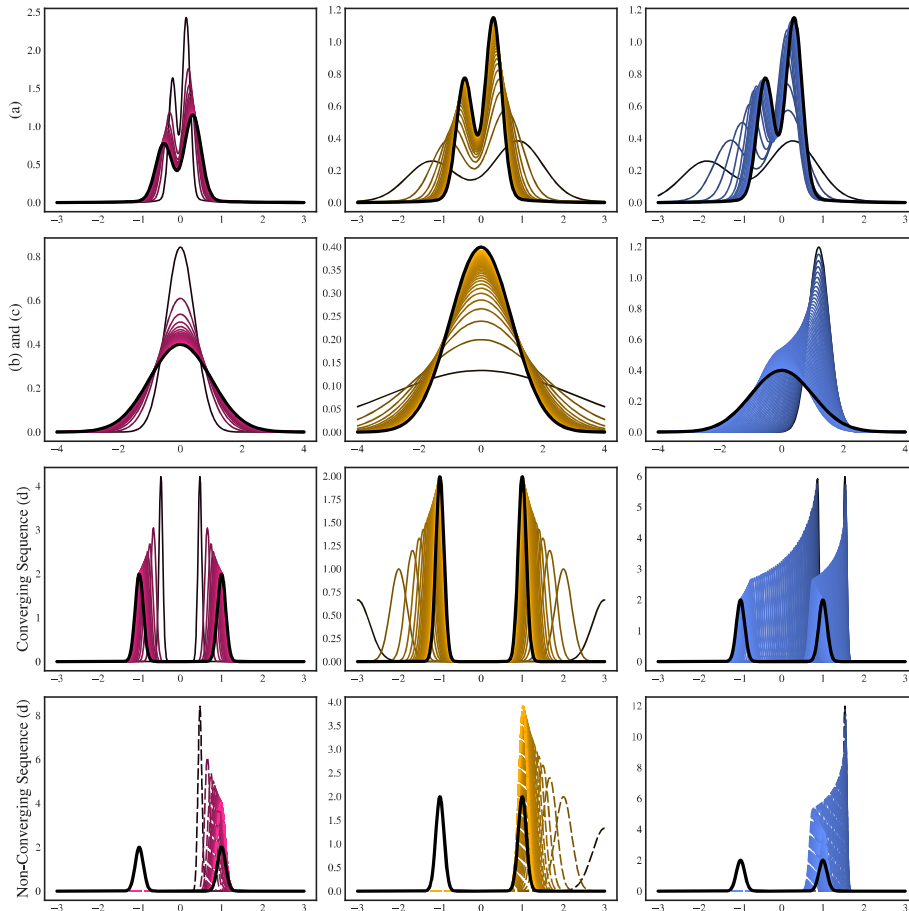

Figure S2: Test sequences  $(\pi_n)_{n \in \mathbb{N}}$  used in Figure 2. The colour and style of each sequence indicates which of the curves in Figure 2 is being considered. In the second row from the top, the sequence used when  $d = 1$  in Figure 2c is shown in the final column.

- Failure mode (d) [Figure 2d]: We took  $p = q$ , with  $p(x) = 0.5\mathcal{N}(x; -1, 0.1^2) + 0.5\mathcal{N}(x; 1, 0.1^2)$ , where  $\mathcal{N}(x; \mu, \sigma^2)$  is the univariate Gaussian density with mean  $\mu$  and variance  $\sigma^2$ . The  $a_n$  and  $b_n$  sequences used are displayed in Figure S1b. For the non-converging sequences we took  $u = \mathcal{N}(1, 0.1^2)$  and used the  $a_n$  and  $b_n$  sequences specified in Figure S1b. The values of GF-KSD reported were computed using a quasi Monte Carlo approximation, using a length 300 low discrepancy sequence. The low discrepancy sequences were obtained by first specifying a uniform grid over  $[0, 1]$  and then performing the inverse CDF transform for each member of the sequence  $\pi_n$ .

In Figure S3, we provide an account of the degradation of convergence detection between  $q = \text{Prior}$  considered in Figure 1 and  $q = \mathcal{N}(0, 1.5^2)$  of Failure mode (a). In Figure S3a, it can be seen that the value of the integrals  $\int (q/p)^2 d\pi_n$  are finite for each element of the pink sequence  $\pi_n$ . However, in Figure S3b, it can be seen that the values of the integrals  $\int (q/p)^2 d\pi_n$  are infinite for the last members of the sequence  $\pi_n$ , thus violating a condition of Theorem 1.

### C.3 Gradient-Free Stein Importance Sampling

This appendix contains full details for the experiment reported in Section 4.1. We considered the following Lotka–Volterra dynamical system:

$$\dot{u}(t) = \alpha' u(t) - \beta' u(t)v(t), \quad \dot{v}(t) = -\gamma' v(t) + \delta' u(t)v(t), \quad (u(0), v(0)) = (u'_0, v'_0).$$

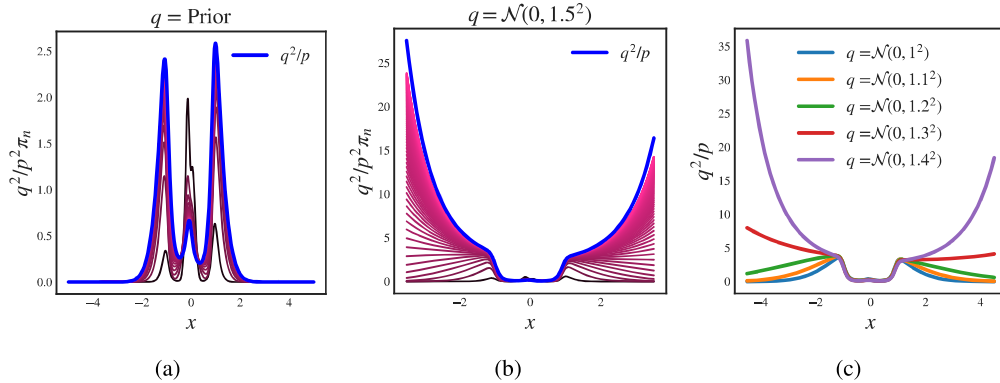

Figure S3: Explanation of Failure Mode (a). (a) Values of  $(q/p)^2\pi_n$  for  $q = \text{Prior}$  and for the converging pink sequence displayed in Figure 1. (b) Values of  $(q/p)^2\pi_n$  for  $q = \mathcal{N}(0, 1.5^2)$  and for the converging pink sequence displayed in the first column and first row of Figure S2. (c) Values of  $q^2/p$  for different choices of  $q$ .

Using 21 observations  $u_1, \dots, u_{21}$  and  $v_1, \dots, v_{21}$  over times  $t_1 < \dots < t_{21}$ , we considered the probability model

$$u_i \sim \text{Log-normal}(\log u(t_i), (\sigma'_1)^2), \quad v_i \sim \text{Log-normal}(\log v(t_i), (\sigma'_2)^2).$$

In order to satisfy positivity constraints, we performed inference on the logarithm of the parameters  $(\alpha, \beta, \gamma, \delta, u_0, v_0, \sigma_1, \sigma_2) = (\log \alpha', \log \beta', \log \gamma', \log \delta', \log u'_0, \log v'_0, \log \sigma'_1, \log \sigma'_2)$ . We took the following independent priors on the constrained parameters:

$$\begin{aligned} \alpha' &\sim \text{Log-normal}(\log(0.7), 0.6^2), & \beta' &\sim \text{Log-normal}(\log(0.02), 0.3^2), \\ \gamma' &\sim \text{Log-normal}(\log(0.7), 0.6^2), & \delta' &\sim \text{Log-normal}(\log(0.02), 0.3^2), \\ u'_0 &\sim \text{Log-normal}(\log(10), 1), & v'_0 &\sim \text{Log-normal}(\log(10), 1), \\ \sigma'_1 &\sim \text{Log-normal}(\log(0.25), 0.02^2), & \sigma'_2 &\sim \text{Log-normal}(\log(0.25), 0.02^2). \end{aligned}$$

In order to obtain independent samples from the posterior for comparison, we utilised Stan [Stan Development Team, 2022] to obtain 8,000 posterior samples using four Markov chain Monte Carlo chains. Each chain was initialised at the prior mode. The data analysed are due to Hewitt [1921] and can be seen, along with a posterior predictive check, in Figure S4.

The Laplace approximation was obtained by the use of 48 iterations of the L-BFGS optimisation algorithm [Liu and Nocedal, 1989] initialised at the prior mode. The Hessian approximation was obtained using Stan's default numeric differentiation of the gradient.

Finally, the quadratic programme defining the optimal weights of gradient-free Stein importance sampling (refer to Theorem 3) was solved using the splitting conic solver of O'Donoghue et al. [2016].

#### C.4 Stein Variational Inference Without Second-Order Gradient

This appendix contains full details for the experiment reported in Section 4.2. We considered the following bivariate densities

$$\begin{aligned} p_1(x, y) &:= \mathcal{N}(x; 0, \eta_1^2) \mathcal{N}(y; \sin(ax), \eta_2^2), \\ p_2(x, y) &:= \mathcal{N}(x; 0, \sigma_1^2) \mathcal{N}(y; bx^2, \sigma_2^2), \end{aligned}$$

where  $\mathcal{N}(x; \mu, \sigma^2)$  is the univariate Gaussian density with mean  $\mu$  and variance  $\sigma^2$ . The parameter choices for the sinusoidal experiment  $p_1$  were  $\eta_1^2 = 1.3^2$ ,  $\eta_2^2 = 0.09^2$  and  $a = 1.2$ . The parameter choices for the banana experiment  $p_2$  were  $\sigma_1^2 = 1$ ,  $\sigma_2^2 = 0.2^2$  and  $b = 0.5$ .

The development of a robust stochastic optimisation routine for measure transport with GF-KSD is beyond the scope of this work, and in what follows we simply report one strategy that was successfully used in the setting of the application reported in the main text. This strategy was based on

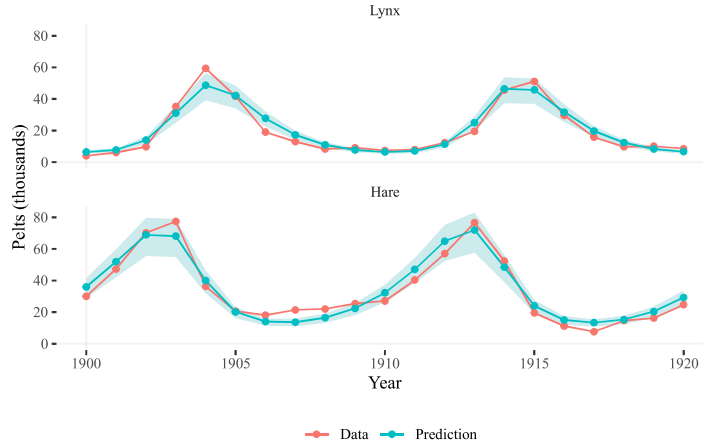

Figure S4: Posterior predictive check for the Lotka–Volterra model. The shaded blue region indicates the 50% interquartile range of the posterior samples.

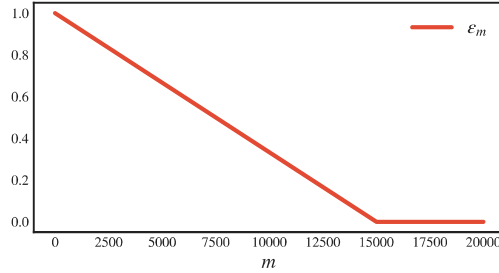

Figure S5: Tempering sequence  $(\epsilon_m)_{m \in \mathbb{N}}$  used in each of the variational inference experiments.

tempering of  $p$ , the distributional target, to reduce a possibly rather challenging variational optimisation problem into a sequence of easier problems to be solved. Specifically, we considered tempered distributions  $p_m \in \mathcal{P}(\mathbb{R}^d)$  with log density

$$\log p_m(x) = \epsilon_m \log p_0(x) + (1 - \epsilon_m) \log p(x),$$

where  $(\epsilon_m)_{m \in \mathbb{N}} \in [0, 1]^{\mathbb{N}}$  is the tempering sequence and  $p_0 \in \mathcal{P}(\mathbb{R}^d)$  is fixed. In this case  $p_0$  was taken to be  $\mathcal{N}(0, 2I)$  in both the banana and sinusoidal experiment. Then, at iteration  $m$  of stochastic optimisation, we considered the variational objective function

$$\pi \mapsto \log D_{p_m, q}(\pi)$$

where  $q = \pi_{\theta_m}$ , as explained in the main text. Tempering has been applied in the context of normalising flows in Prangle and Viscardi [2023]. The tempering sequence used  $(\epsilon_m)_{m \in \mathbb{N}}$  for each of the experiments is displayed in Figure S5.

For each experiment, the stochastic optimisation routine used was Adam [Kingma and Ba, 2015] with learning rate 0.001. Due to issues involving exploding gradients due to the  $q/p$  term in GF-KSD, we utilised gradient clipping in each of the variational inference experiments, with the maximum 2-norm value taken to be 30. In both the banana and sinusoidal experiment, the parametric class of transport maps  $T^\theta$  was the *inverse autoregressive flow* of Kingma et al. [2016]. In the banana experiment, the dimensionality of the hidden units in the underlying autoregressive neural network was taken as 20. In the sinusoidal experiment, the dimensionality of the hidden units in the underlying autoregressive neural network was taken as 30. For the comparison with standard kernel Stein discrepancy, the same parametric class  $T^\theta$  and the same initialisations of  $\theta$  were used.

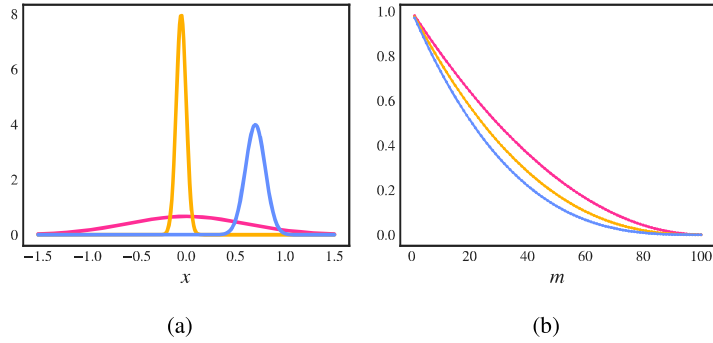

Figure S6: The  $\pi_0$  and tempering sequences used in the additional convergence detection experiments. The colour of each curve indicates which of the sequences in Figure S7 and Figure S8 they correspond with. (a) The  $\pi_0$  choices of each tempered sequence of distributions. (b) The tempering sequences  $(\epsilon_m)_{m \in \mathbb{N}}$  considered.

## C.5 Additional Experiments

Appendix C.5.1 explores the impact of  $p$  on the conclusions drawn in the main text. Appendix C.5.2 investigates the sensitivity of the proposed discrepancy to the choice of the parameters  $\sigma$  and  $\beta$  that appear in the kernel. Appendix C.5.3 compares the performance of GF-KSD importance sampling, KSD importance sampling and self-normalised importance sampling.

### C.5.1 Exploring the Effect of $p$

In this section we investigate the robustness of the convergence detection described in Figure 1 subject to different choices of the target  $p$ . We consider two further choices of  $p$ :

$$p_1(x) = \sum_{i=1}^4 c_i \mathcal{N}(x; \mu_i, \sigma_i^2),$$

$$p_2(x) = \sum_{i=1}^4 d_i \text{Student-T}(x; \nu, m_i, s_i),$$

where  $\mathcal{N}(x; \mu, \sigma^2)$  is the univariate Gaussian density with mean  $\mu$  and variance  $\sigma^2$  and  $\text{Student-T}(x; \nu, m, s)$  is the univariate Student-T density with degrees of freedom  $\nu$ , location parameter  $m$  and scale parameter  $s$ . The parameter choices for  $p_1$  were

$$(c_1, c_2, c_3, c_4) = (0.3125, 0.3125, 0.3125, 0.0625),$$

$$(\mu_1, \mu_2, \mu_3, \mu_4) = (-0.3, 0, 0.3, 0),$$

$$(\sigma_1^2, \sigma_2^2, \sigma_3^2, \sigma_4^2) = (0.1^2, 0.05^2, 0.1^2, 1).$$

The parameter choices for  $p_2$  were  $\nu = 10$  and

$$(d_1, d_2, d_3, d_4) = (0.1, 0.2, 0.3, 0.4),$$

$$(m_1, m_2, m_3, m_4) = (-0.4, -0.2, 0, 0.3),$$

$$(s_1, s_2, s_3, s_4) = (0.05, 0.1, 0.1, 0.3).$$

Instead of using the location-scale sequences of Figure 1, we instead considered tempered sequences of the form

$$\log \pi_n(x) = \epsilon_n \log \pi_0(x) + (1 - \epsilon_n) \log u(x).$$

For the converging sequences considered we set  $u$  to be the target (either  $u = p_1$  or  $u = p_2$ ) and set  $u = \mathcal{N}(x; 0, 0.4^2)$  for each of the non-converging sequences. The different sequences vary in choice of  $\pi_0$  and tempering sequence  $(\epsilon_n)_{n \in \mathbb{N}}$ . These choices are displayed in Figure S6 and are taken as the same for both of the targets considered.

The specification of our choices of  $q$  is the following:

- **Prior:** For  $p_1$ , we took  $q \sim \mathcal{N}(0, 0.5^2)$ . For  $p_2$ , we took  $q \sim \text{Student-T}(10, 0, 0.5)$ .
- **Laplace:** For  $p_1$ , the Laplace approximation computed was  $q \sim \mathcal{N}(0, 0.051^2)$ . For  $p_2$ , the Laplace approximation computed was  $q \sim \mathcal{N}(0, 0.125^2)$ .
- **GMM:** For both targets, the Gaussian mixture model was computed using 100 samples from the target. In both cases, the number of components used was 3, since this value minimised the Bayes information criterion [Schwarz, 1978].
- **KDE:** For both targets, the kernel density estimate was computed using 100 samples from the target. In both cases, we utilised a Gaussian kernel  $k(x, y) = \exp(-(x - y)^2 / \ell^2)$  with the lengthscale or bandwidth parameter  $\ell$  determined by Silverman's rule of thumb [Silverman, 1986].

Results for  $p_1$  are displayed in Figure S7 and results for  $p_2$  are displayed in Figure S8. It can be seen that for both target distributions and the different sequences considered, GF-KSD correctly detects convergence in each case. For both targets and for  $q = \text{Laplace}$ , it can be seen that GF-KSD exhibits the same behaviour of Failure Mode (b), displayed in Figure 2b.

The values of GF-KSD reported in Figure S7 and Figure S8 were computed using a quasi Monte Carlo approximation to the integral (6), utilising a length 300 low-discrepancy sequence. Due to the lack of an easily computable inverse CDF, we performed an importance sampling estimate of GF-KSD as follows

$$\begin{aligned} D_{p,q}(\pi) &= \iint (\mathcal{S}_{p,q} \otimes \mathcal{S}_{p,q}) k(x, y) \, d\pi(x) \, d\pi(y) \\ &= \iint (\mathcal{S}_{p,q} \otimes \mathcal{S}_{p,q}) k(x, y) \frac{\pi(x)\pi(y)}{w(x)w(y)} \, dw(x) \, dw(y), \end{aligned}$$

where  $w$  is the proposal distribution. For each element of a sequence  $\pi_n$ , we used a Gaussian proposal  $w_n$  of the form:

$$\log w_n(x) = \epsilon_n \log \pi_0(x) + (1 - \epsilon_n) \log \mathcal{N}(x; 0, 0.4^2).$$

Since  $\pi_0$  is Gaussian for each sequence, this construction ensures that each  $w_n$  is both Gaussian and a good proposal distribution for  $\pi_n$ . The low-discrepancy sequences were then obtained by first specifying a uniform grid over  $[0, 1]$  and the performing an inverse CDF transformation using  $w_n$ .

### C.5.2 Exploring the Effect of $\sigma$ and $\beta$

In this section we investigate the effect on convergence detection that results from changing the parameters  $\sigma$  and  $\beta$  in the inverse multi-quadratic kernel (2). Utilising the same test sequences and choices of  $q$  used in Figure 1, we plot the values of GF-KSD in Figure S9. It can be seen that the convergence detection is robust to changing values of  $\sigma$  and  $\beta$ .

### C.5.3 GF-KSD vs. KSD Importance Sampling

In this section we investigate the performance of gradient-free Stein importance sampling, standard Stein importance sampling, and self-normalised importance sampling, as the distribution  $q$  varies in quality as an approximation to  $p$ . We consider two different regimes:

1.  $p = \mathcal{N}(0, I)$  and  $q = \mathcal{N}(0, \lambda I)$  for  $0.7 \leq \lambda \leq 1.3$ .
2.  $p = \mathcal{N}(0, I)$  and  $q = \mathcal{N}(c\mathbf{1}, I)$  for  $-0.6 \leq c \leq 0.6$ , where  $\mathbf{1} = (1, \dots, 1)^\top$ .

In both cases, we consider the performance of each approach for varying dimension  $d$  and number of samples  $n$ . Results are reported in Figure S10 and Figure S11 for each regime respectively. The quadratic programme defining the optimal weights of gradient-free Stein importance sampling and Stein importance sampling (refer to Theorem 3) was solved using the splitting conic solver of O'Donoghue et al. [2016].

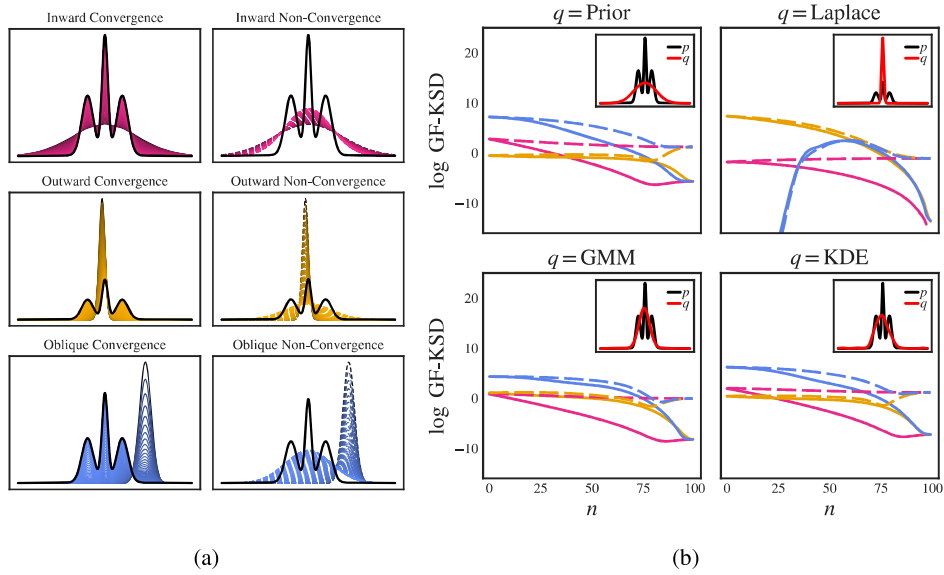

Figure S7: Additional empirical assessment of gradient-free kernel Stein discrepancy using the target  $p_1$  defined in Appendix C.5.1. (a) Test sequences  $(\pi_n)_{n \in \mathbb{N}}$ , defined in Appendix C.5.1. The first column displays sequences (solid) that converge to the distributional target  $p$  (black), while the second column displays sequences (dashed) which converge instead to a fixed Gaussian target. (b) Performance of gradient-free kernel Stein discrepancy, when different approaches to selecting  $q$  are employed. The colour and style of each curve in (b) indicates which of the sequences in (a) is being considered. [Here we fixed the kernel parameters  $\sigma = 1$  and  $\beta = 1/2$ .]

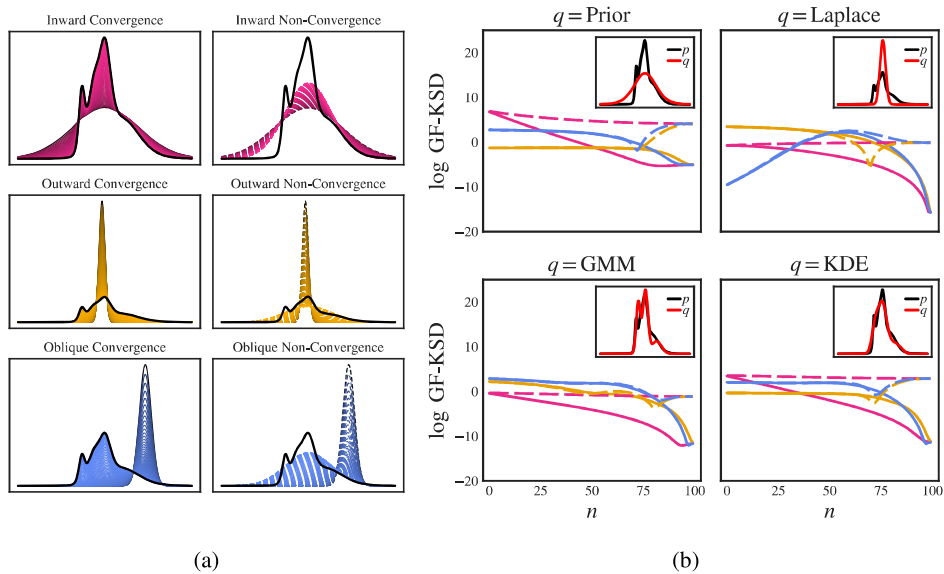

Figure S8: Additional empirical assessment of gradient-free kernel Stein discrepancy using the target  $p_2$  defined in Appendix C.5.1. (a) Test sequences  $(\pi_n)_{n \in \mathbb{N}}$ , defined in Appendix C.5.1. The first column displays sequences (solid) that converge to the distributional target  $p$  (black), while the second column displays sequences (dashed) which converge instead to a fixed Gaussian target. (b) Performance of gradient-free kernel Stein discrepancy, when different approaches to selecting  $q$  are employed. The colour and style of each curve in (b) indicates which of the sequences in (a) is being considered. [Here we fixed the kernel parameters  $\sigma = 1$  and  $\beta = 1/2$ .]



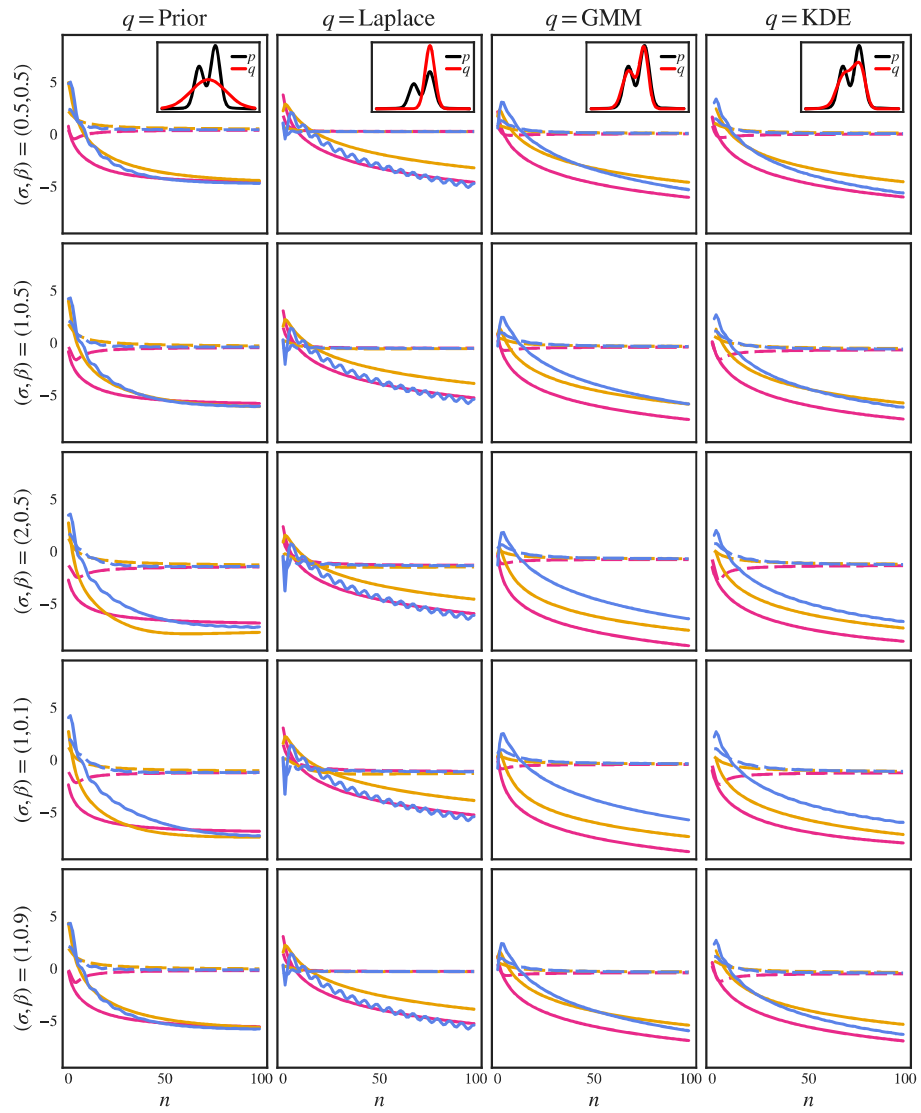

Figure S9: Comparison of different values of  $\sigma$  and  $\beta$  in the inverse multiquadric kernel. Here the vertical axis displays the logarithm of the gradient free kernel Stein discrepancy. The colour and style of each of the curves indicates which of the sequences in Figure 1 is being considered.

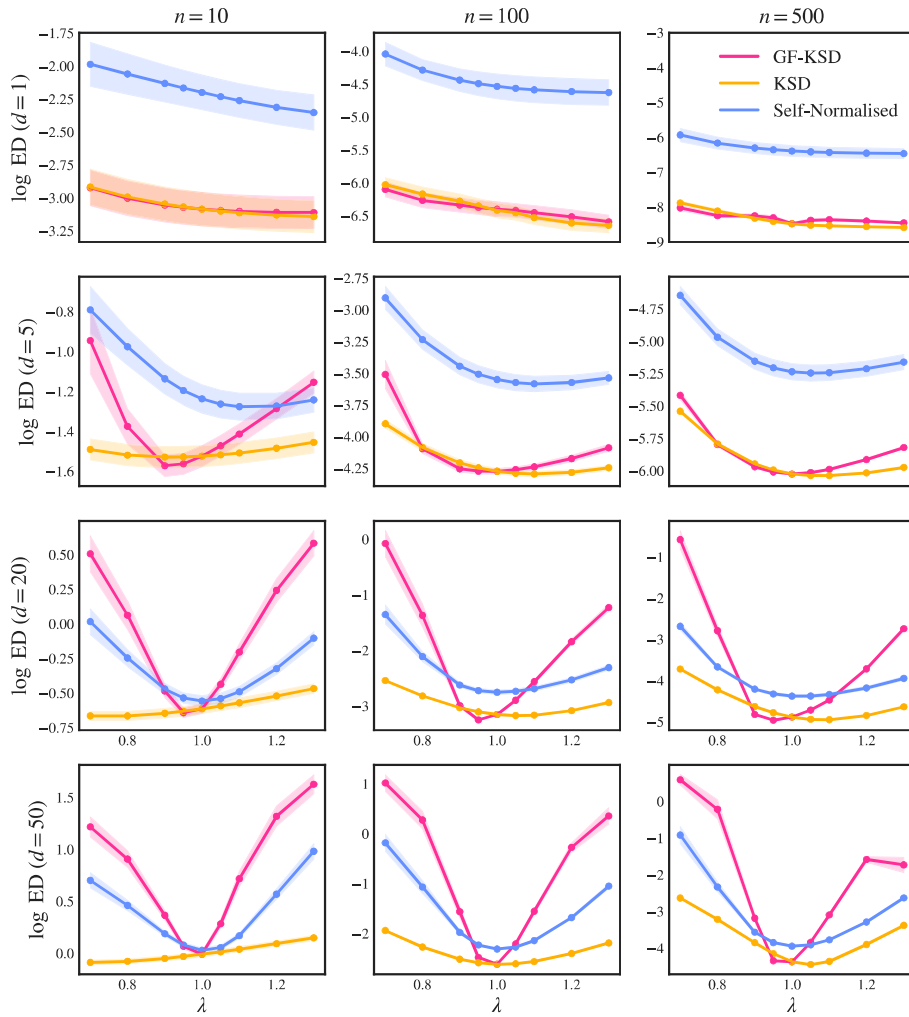

Figure S10: Comparison of the performance of importance sampling methodologies in varying dimension  $d$  and number of sample points considered  $n$  under the regime  $q = \mathcal{N}(0, \lambda I)$ . The approximation quality is quantified as the logarithm of the Energy Distance (ED).

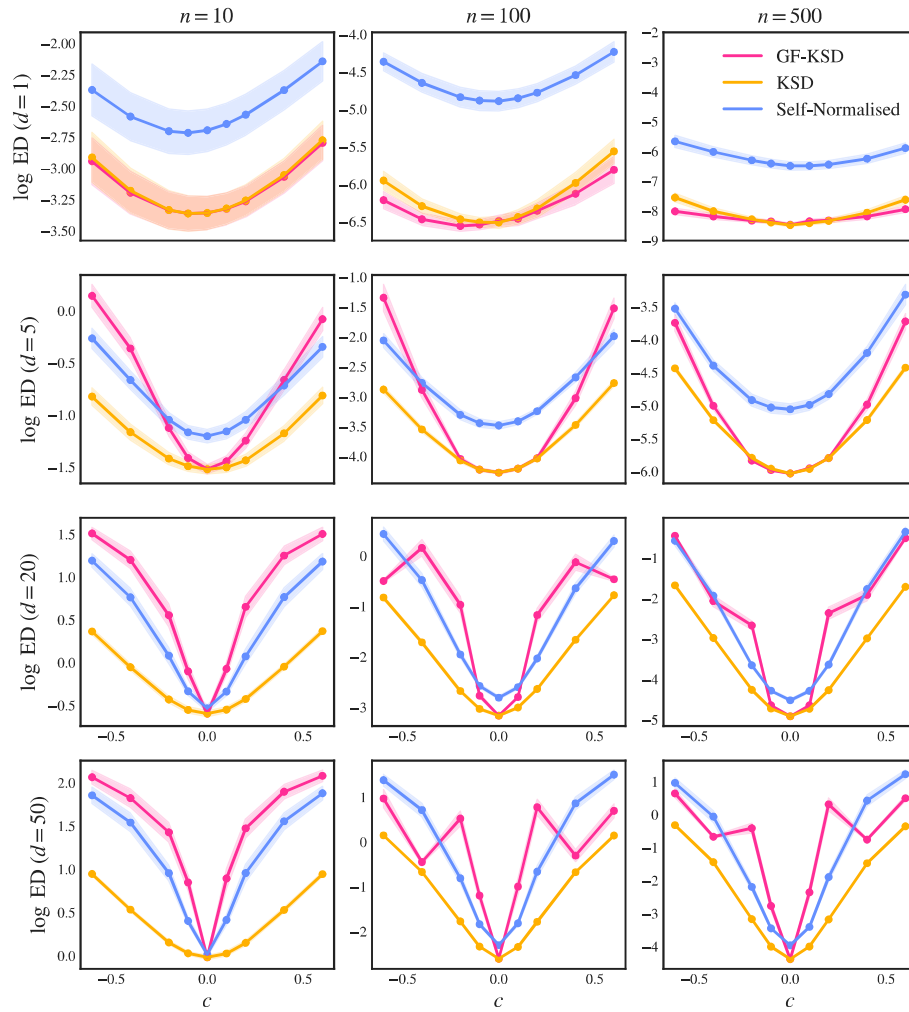

Figure S11: Comparison of the performance of importance sampling methodologies in varying dimension  $d$  and number of sample points considered  $n$  under the regime  $q = \mathcal{N}(c, I)$ . The approximation quality is quantified as the logarithm of the Energy Distance (ED).
